# Supplementary material for: The signature motif of the Saccharomyces cerevisiae Pif1 DNA helicase is essential in vivo for mitochondrial and nuclear functions and in vitro for ATPase activity
Source: PubMed Central journal article supplement — Nucleic Acids Res. 2018 Jul 26;46(16):8357–70. doi: 10.1093/nar/gky655 (PMC6144861; doi:10.1093/nar/gky655), 2018-07-26

## Supplementary Materials and Methods

**Supplemental Table 1. *S. cerevisiae* strains used in this study**

| Strains | Genotype                                                                                                                                          | Reference  |
|---------|---------------------------------------------------------------------------------------------------------------------------------------------------|------------|
| W303    | <i>MATa/MAT<math>\alpha</math> leu2-3,112 trp1-1 can1-100 ura3-1 ade2-1 his3-11, 15 RAD5+</i>                                                     | (1)        |
| YCG59   | W303 <i>PIF1/pif1::NatMX6 DNA2/dna2::KanMX6</i>                                                                                                   | This study |
| YPH500  | <i>MAT<math>\alpha</math> ura3-52 lys2-801_amber ade2-101_ochre trp1<math>\Delta</math>63 his3<math>\Delta</math>200 leu2<math>\Delta</math>1</i> | (2)        |
| MBY77   | YPH500 <i>hxt13::URA3 pif1::His3MX6</i>                                                                                                           | M. Bochman |

**Supplemental Table 2. Plasmids used in this study**

| Name   | Plasmid information                                       | Reference  |
|--------|-----------------------------------------------------------|------------|
| pVS102 | CEN ARS <i>TRP1 PIF1</i> promoter <i>PIF1</i>             | (3)        |
| pMB13  | CEN ARS <i>TRP1</i>                                       | M. Bochman |
| pMB282 | pMB13 <i>RRM3</i> promoter <i>PIF1</i> C-terminal 3xFLAG  | (4)        |
| pCG17  | pMB282 <i>PIF1</i> promoter <i>PIF1</i> C-terminal 3xFLAG | This study |
| pCG18  | pCG17-Pif1-K264A                                          | This study |
| pCG19  | pCG17-Pif1-SM $\Delta$ 6                                  | This study |
| pCG20  | pCG17-Pif1- SM $\Delta$ 21                                | This study |
| pCG22  | pCG17-Pif1-P367A                                          | This study |
| pCG23  | pCG17-Pif1-L354P                                          | This study |
| pCG24  | pCG17-Pif1-F368A                                          | This study |
| pCG25  | pCG17-Pif1-G369A                                          | This study |
| pCG26  | pCG17-Pif1-I371A                                          | This study |
| pCG27  | pCG17-Pif1-G370A                                          | This study |
| pCG30  | pCG17-Pif1-L354A                                          | This study |
| pCG41  | pCG17-Pif1-SM6A                                           | This study |
| pCG45  | pCG17-Pif1-Q372A                                          | This study |
| pCG46  | pCG17-Dda $\alpha$ -helix                                 | This study |
| pCG47  | pCG17-Pif1-SM6G                                           | This study |
| pCG48  | pCG17-BsPif1-SM                                           | This study |
| pCG50  | pCG17-Pif1-SM15A                                          | This study |

**Supplemental Figure 1. (A)** Sequence alignment of Pif1-family helicases and T4 phage Dda. **(B)** Structural alignment of homology model of ScPif1 and T4 phage Dda helicase (PDB: 3upu). ScPif1 and Dda are both SFI DNA helicases. In ScPif1, the SM is located between helicase motifs II and III and folds into an  $\alpha$ -helix with an extended loop. Structural analyses (5) show that the Dda helicase has  $\alpha$ -helix and loop located between helicase motifs II and III. In the Dda  $\alpha$ -helix allele, the sequence of the Dda helix replaces that of the ScPif1  $\alpha$ -helix.

**Supplemental Figure 2. (A)** Western blot analysis of 3xFLAG tagged WT and ScPif1 mutant proteins after resolution on a 5% SDS-PAGE gel as described in Materials and Methods. The protein expression was quantified by normalizing to the signal of the tubulin loading control. **(B)** Growth rate of WT and SM mutants grown in minimal media. Saturated cells were diluted to a starting OD<sub>660</sub> of 0.05 and incubated at 30°C. The OD was measured hourly for up to ten hours and then the doubling time was calculated.

**Supplemental Figure 3.** Analysis of telomere lengths in cells expressing different *PIF1* alleles. Genomic DNA was isolated from three or more independent isolates. **(A)** Lanes contain DNA from WT (lanes 1, 16), *pif1* $\Delta$  (lanes 2, 15), Q372A (lanes 3-5), SM6G (lanes 6-8), BsPif1-SM (lanes 9-11), and Dda  $\alpha$ -helix (lanes 12-14). **(B)** Lanes contain DNA from SM6A (lanes 1-3), F368A (lanes 4-6), G370A (lanes 7-9), and I371A (lanes 10-12). **(C)** Lanes contain DNA from WT (lanes 1-3), SM $\Delta$ 21 (lanes 4-6), SM $\Delta$ 6 (lanes 7-9), SM15A (lanes 10-12), P367A (lanes 12-15), and G369A (lanes 16-18). **(D)** Lanes contain DNA from WT (lanes 1, 14), K264A (lanes 2-4), L354A (lanes 5-7), F368A (lanes 8-10), and G370A (lanes 11-13). Average telomere lengths measured from these telomere blots were used to generate the graph in Figure 4B.

## REFERENCES

1. Thomas, B.J. and Rothstein, R. (1989) Elevated recombination rates in transcriptionally active DNA. *Cell*, **56**, 619–630.
2. Sikorski, R.S. and Hieter, P. (1989) A system of shuttle vectors and yeast host strains designed for efficient manipulation of DNA in *Saccharomyces cerevisiae*. *Genetics*, **122**, 19–27.
3. Schulz, V.P. and Zakian, V.A. (1994) The *Saccharomyces* Pif1 DNA Helicase Inhibits Telomere Elongation and De Novo Telomere Formation. *Cell*, **76**, 145–155.
4. Paeschke, K., Bochman, M.L., Garcia, P.D., Cejka, P., Friedman, K.L., Kowalczykowski, S.C. and Zakian, V.A. (2013) Pif1 family helicases suppress genome instability at G-quadruplex motifs. *Nature*, **497**, 458–462.
5. He, X., Byrd, A.K., Yun, M.-K., Pemble, C.W., Harrison, D., Yeruva, L., Dahl, C., Kreuzer, K.N., Raney, K.D. and White, S.W. (2012) The T4 phage SF1B helicase Dda is structurally optimized to perform DNA strand separation. *Structure*, **20**, 1189–200.



# Supplemental Figure 2

## A

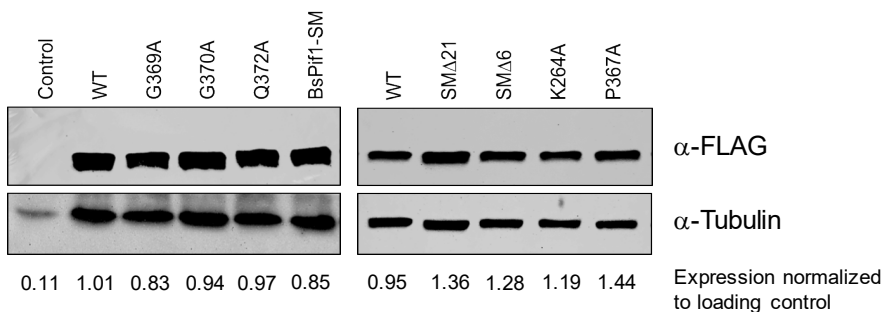

## B

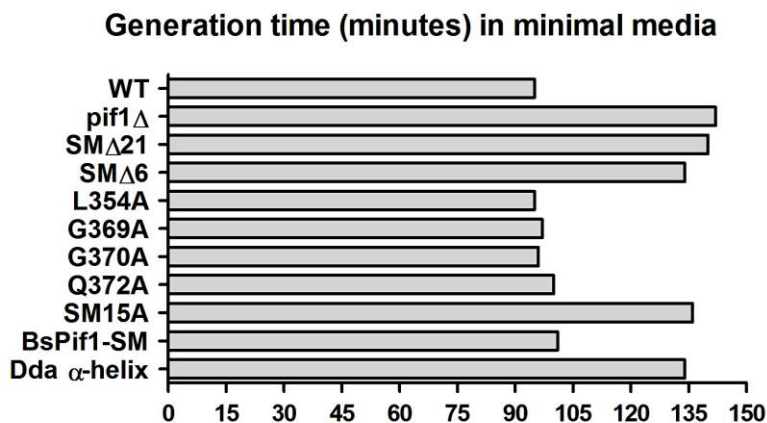

# Supplemental Figure 3

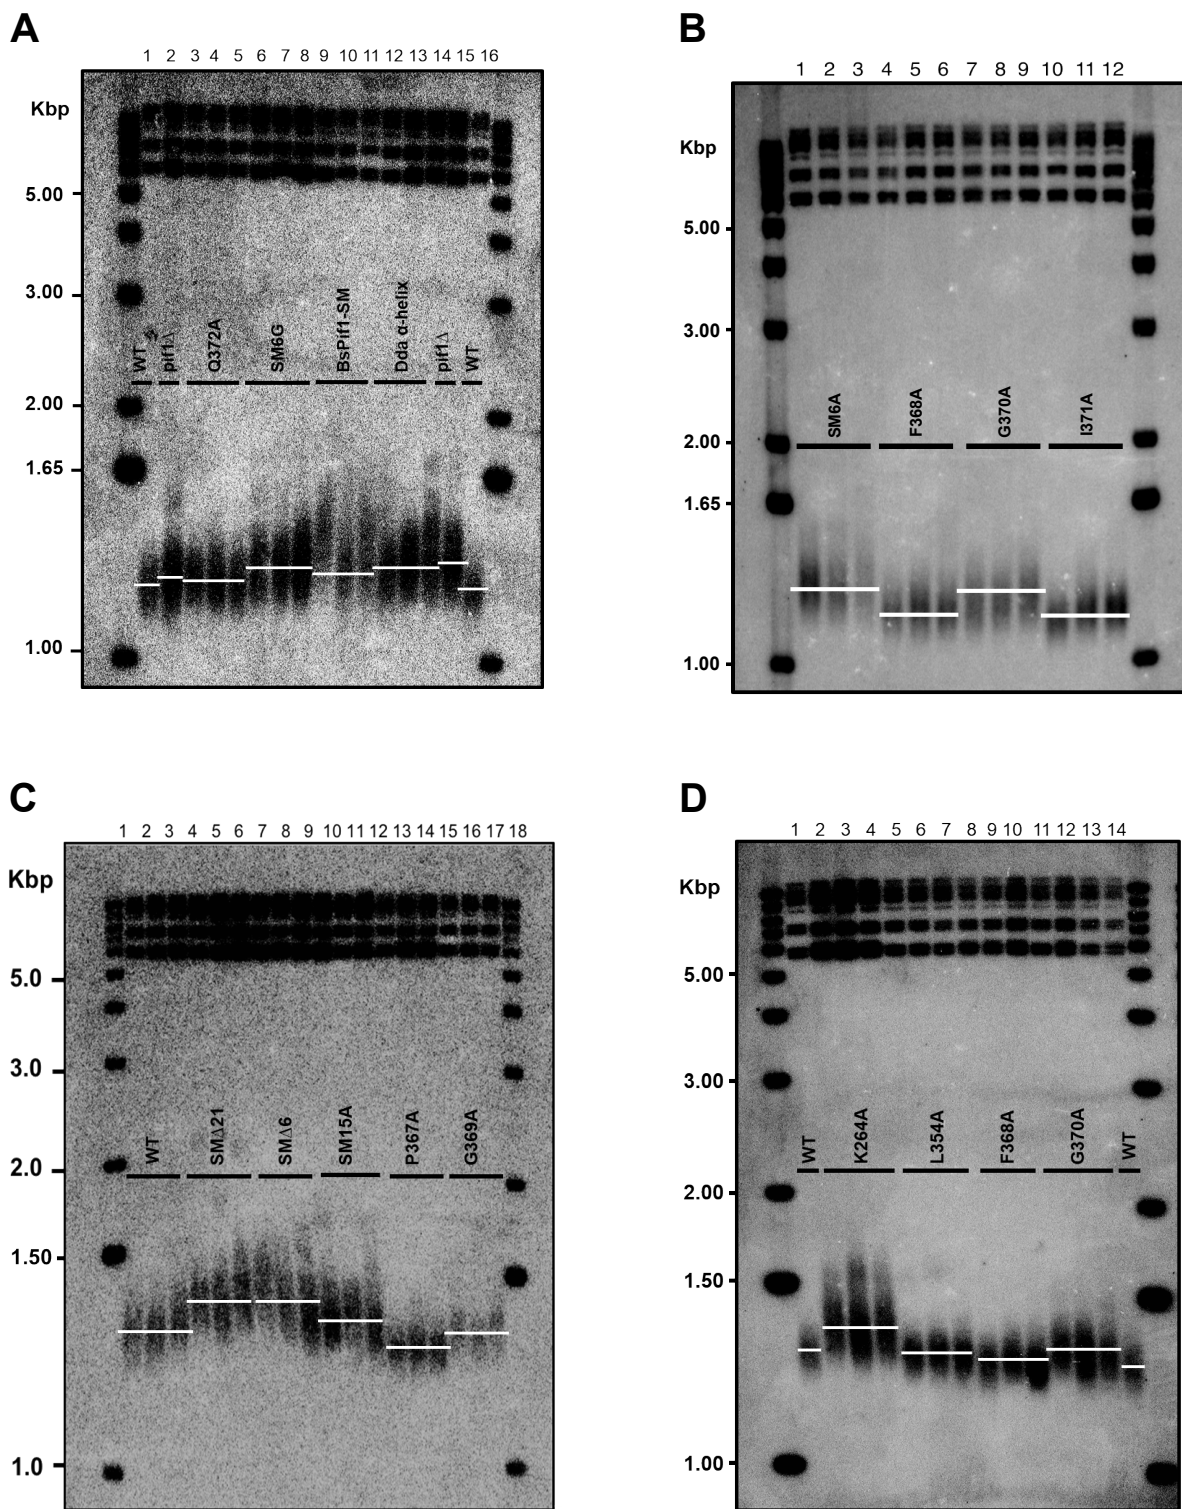

Supplement: gky655_supplemental_files.pdf [file gky655_supplemental_files.pdf]
